# Supplementary material
Source: ML conference proceedings conference paper supplement (https://openreview.net/forum?id=TBIzh9b5eaz)
Supplement: supplementary_material [file attachment]

## A EXTENDED EXPERIMENTAL RESULTS

### A.1 CAR

We ran the Car environment for RAAC, D4PG and WCPG using 5 independent random seeds. We evaluate final policies for 1000 interactions and report the averaged results with corresponding standard deviation in Table 1. In Figure 3, we show the trajectories when following aforementioned policies.

**Reward function design** We use the reward function given by

$$R_t(s, a) = -10 + 370\mathbb{I}_{x_t=x_g} - 25\mathbb{I}_{v_t>1} \cdot \mathcal{B}_{0.2},$$

where  $\mathbb{I}$  is an indicator function and  $\mathcal{B}_{0.2}$  is a Bernoulli Random Variable with probability  $p = 0.2$ . That is,  $r_f = 370$  is a sparse reward that the agent gets at the goal and  $r_d = -10$  is a negative reward that penalizes delays on reaching the goal. Finally, the agent receives a negative reward of  $r_v = -25$  with probability 0.2 when it exceeds the  $v > 1$  threshold. As the returns is a sum of bernoulli R.V. we know that it will be a Binomial distribution. For this particular case, we expect that if the number of steps is large enough, the Gaussianity assumption that WCPG does is good as Binomial distributions are asymptotically Gaussian (Vershynin, 2018). However, the episode terminates after at most thirteen risky steps and the approximation is not good.

We show in Figure 3 the trajectories for RAAC, D4PG and WCPG.

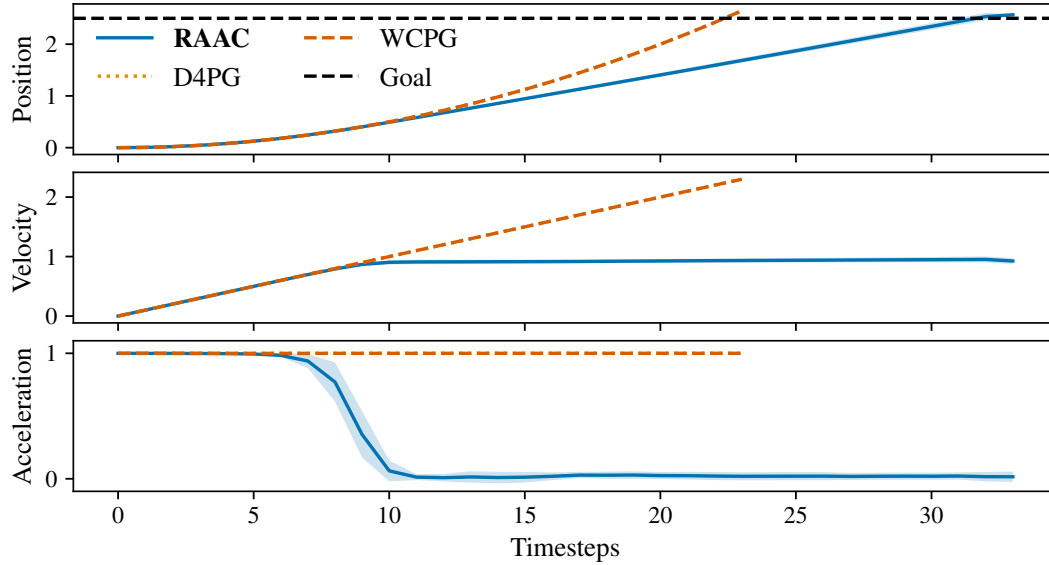

Figure 3: Evolution of car states and input control when following learned policies for RAAC, WCPG and D4PG. We use policies from 5 independent seeds for each algorithm. RAAC learns to saturate the velocity below the speed limit.

## A.2 MUJoCo ENVIRONMENTS

We ran 5 independent random seeds and evaluate for 20 episodes the policy every 100 gradient steps for *HalfCheetah* and 500 gradient steps for *Hopper* and *Walker2d*. We plot the learning curves of the medium variants in Figure 4 and expert variant in Figure 5. To report the tests in Table 2, we early-stop the policy that outputs the best CVaR and evaluate on 100 episodes with 5 different random seeds.

**Behavior policies** For sake of reference, we evaluate the stochastic reward function on the state-action pairs in the behavior data set. Unfortunately, the data sets do not distinguish between episodes. Hence, to estimate the returns, we use the state-action distribution in the data set and split it into chunks of 200 time steps for the Half-Cheetah and 500 time steps for the Walker2D and the Hopper. We then compute the return of every chunk by sampling a realization from its stochastic reward function. Finally, we bootstrap the resulting chunks into 10 datasets by sampling uniformly at random with replacement and estimate the mean and  $\text{CVaR}_{0.1}$  of the returns in each batch. We report the average of the bootstrap splits together with the standard deviation in Table 2.

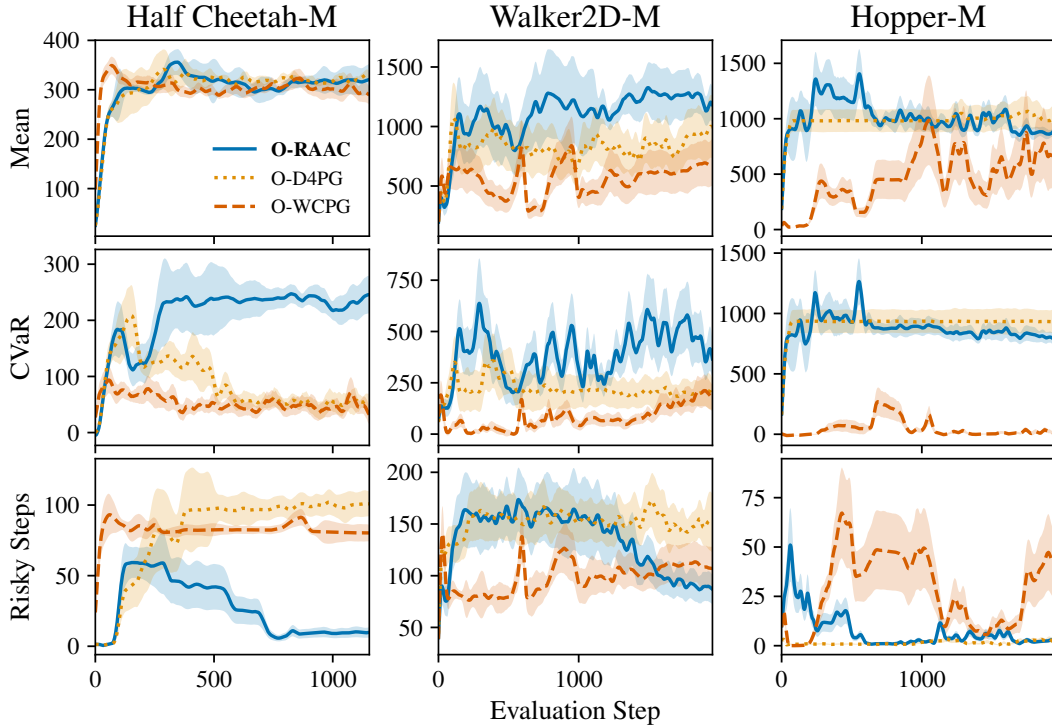

Figure 4: Experimental results across several Mujoco tasks for the Medium variant of each dataset.

## A.3 ADDITIONAL EXPERIMENTAL DETAILS

### A.3.1 ARCHITECTURES

We use neural networks as function approximators for all the elements in the architecture.

**Critic architecture:** For the critic architecture, we build on the IQN network Dabney et al. (2018) but we extend it to the continuous action setting by adding an additional action input to the critic network, resulting in the function:

$$Z(s, a; \tau) = f(m_{sa\tau}([m_{sa}(\psi_s(s), \psi_a(a))], \psi_\tau(\tau)]), \quad (12)$$

where  $\psi_s : \mathcal{X} \rightarrow \mathbb{R}^d$ ,  $\psi_a : \mathcal{A} \rightarrow \mathbb{R}^d$ ,  $m_{sa} : \mathbb{R}^{d \times d} \rightarrow \mathbb{R}^n$ ,  $m_{sa\tau} : \mathbb{R}^n \rightarrow \mathbb{R}^n$ ,  $\psi_\tau : \mathbb{R} \rightarrow \mathbb{R}^n$  and  $f : \mathbb{R}^n \rightarrow \mathbb{R}$

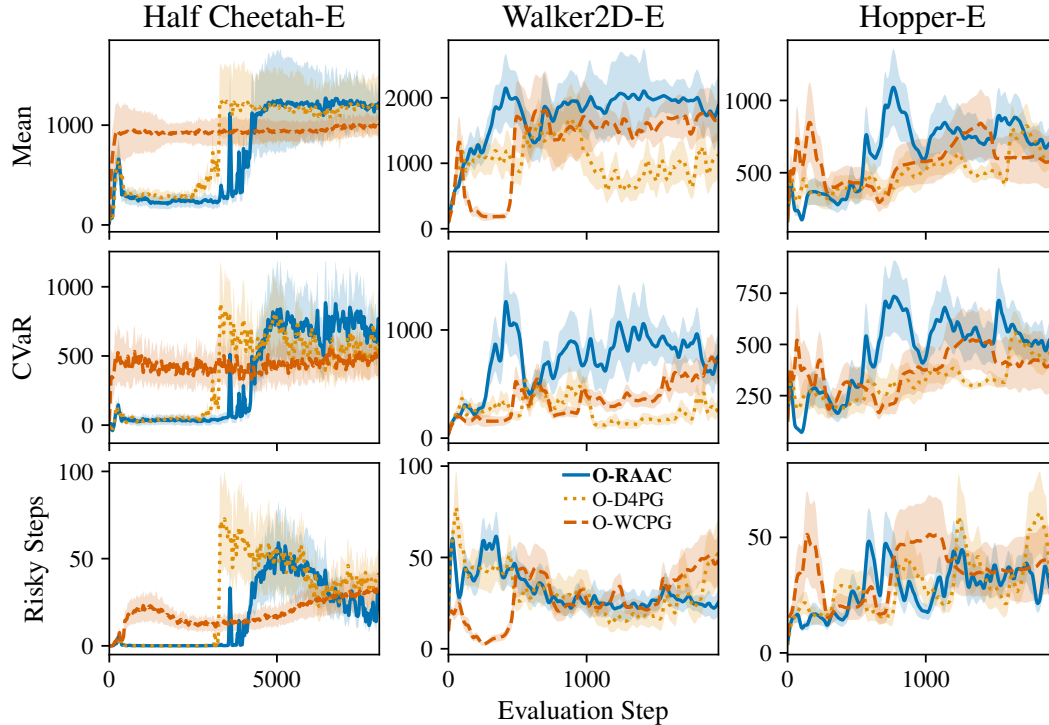

Figure 5: Experimental results across several Mujoco tasks for the Expert variant of each dataset.

For the embedding  $\psi_\tau$  we use a linear function of  $n$  cosine basis functions of the form  $\cos(\pi i \tau)$   $i = 1.., n$ , with  $n = 16$  as proposed in Dabney et al. (2018). For  $\psi_s, \psi_a$  we use a multi-layer perceptron (MLP) with a single hidden layer with  $d = 64$  units for the Car experiment and with  $d = 256$  units for all MuJoCo experiments. For the merging function  $m_{sa}$ , which takes as an input the concatenation of  $\psi_s(s)$  and  $\psi_a(a)$ , we use a single hidden layer with  $n = 16$  units. For the merging function  $m_{sa\tau}$ , we force interaction between its two inputs via a multiplicative function  $m_{sa\tau}(u_1, u_2) = u_1 \odot u_2$ , where  $u_1 = m_{sa}(\psi_s(s), \psi_a(a))$  and  $u_2 = \psi_\tau(\tau)$  and  $\odot$  denotes the element-wise product of two vectors. For  $f$  we use a MLP with a single hidden layer with 32 units. We used ReLU non-linearities for all the layers.

**Actor architecture:** The architecture of the actor model is

$$\pi(a|s) = b + \lambda \xi_\theta(s, b) \quad (13)$$

where  $\xi : \mathcal{A} \rightarrow \mathbb{R}^{\|\mathcal{A}\|}$  and  $b$  is the output of the imitation learning component. For the RAAC algorithm we remove  $b$  and set  $\lambda = 1$ .

For the Car experiments, we used a MLP with 2 hidden layers of size 64. For the MuJoCo experiments, based on Fujimoto et al. (2019), we used a MLP embedding with 3 hidden layers of sizes 400, 300 and 300. We used ReLU non-linearities for all the hidden layers and we saturate the output with a Tanh non-linearity.

**VAE architecture:** The architecture of the conditional VAE $_\phi$  is also based on Fujimoto et al. (2019). It is defined by two networks, an encoder  $E_{\phi_1}(s, a)$  and decoder  $D_{\phi_2}(s, z)$ . Each network has two hidden layers of size 750 and it uses ReLU non-linearities.

### A.3.2 HYPERPARAMETERS

All the network parameters are updated using Adam (Kingma & Ba, 2015) with learning rates  $\eta = 0.001$  for the critic and the VAE, and  $\eta = 0.0001$  for the actor model, as in Fujimoto et al. (2019). The target networks for the critic and the perturbation models are updated softly with  $\mu = 0.005$ .

For the critic loss (4) we use  $N = N' = 32$  quantile samples, whereas to approximate the CVaR to compute the actor loss (5) (7) we use 8 samples from the uniform distribution between  $[0, 0.1]$ .

In Figure 6, we show an ablation on the effect of the hyper-parameter lambda. As we can see, a correct selection of lambda is of crucial performance as it trades-off pure imitation learning with pure reinforcement learning. As  $\lambda \rightarrow 0$ , the policy imitates the behavior policy has poor risk-averse performance. As  $\lambda \rightarrow 1$ , the policy suffers from the bootstrapping error and the performance is also low. We find values of  $\lambda \in [0.05, 0.5]$  to be the best, although the specific  $\lambda$  is environment dependent. This observation coincides with those in Fujimoto et al. (2019, Appendix D.1).

For all MuJoCo experiments, the  $\lambda$  parameter which modulates the action perturbation level was experimentally set to 0.25, except for the HalfCheetah-medium experiment for which it was set to 0.5. As we can see from Figure 6, this is not the best value of  $\lambda$ , but rather a value that performs well across most environments.

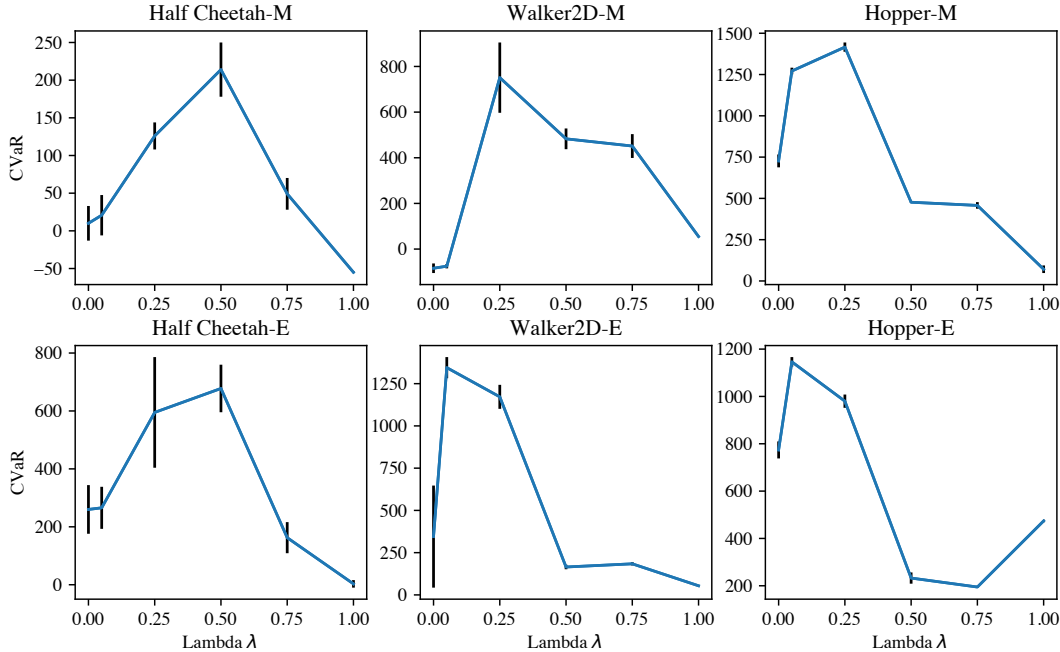

Figure 6: Effect of the hyperparameter  $\lambda$  on the CVaR of the returns for each of the MuJoCo environments. As  $\lambda \rightarrow 0$ , the policy imitates the behavior policy has poor risk-averse performance. As  $\lambda \rightarrow 1$ , the policy suffers from the bootstrapping error and the performance is also low. The best  $\lambda$  is environment dependent.
